# Supplementary material
Source: PubMed Central journal article supplement (PMC3989163)
Supplement: NIHMS554119-supplement-1.pdf [file NIHMS554119-supplement-1.pdf]

# Supplemental Figure 1

## CMV-

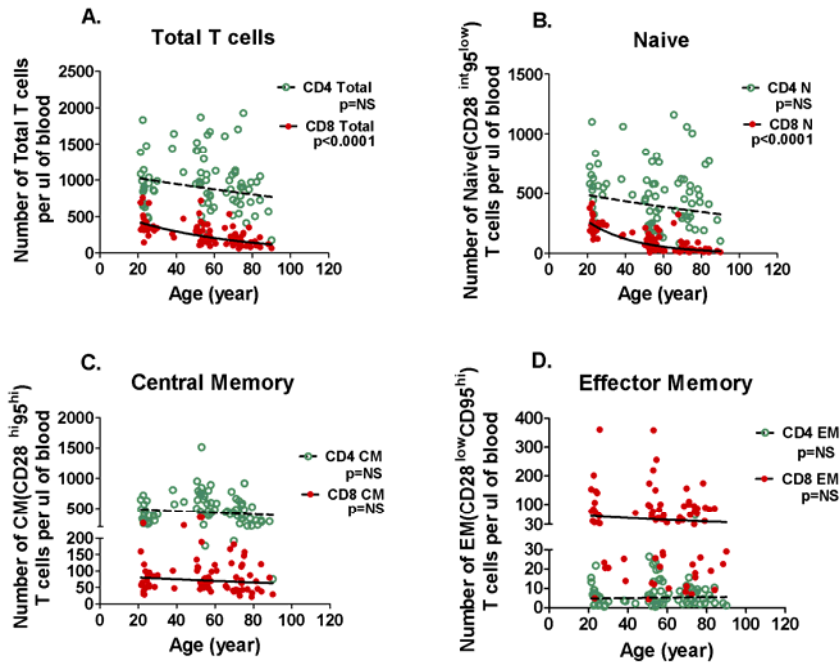

## CMV+

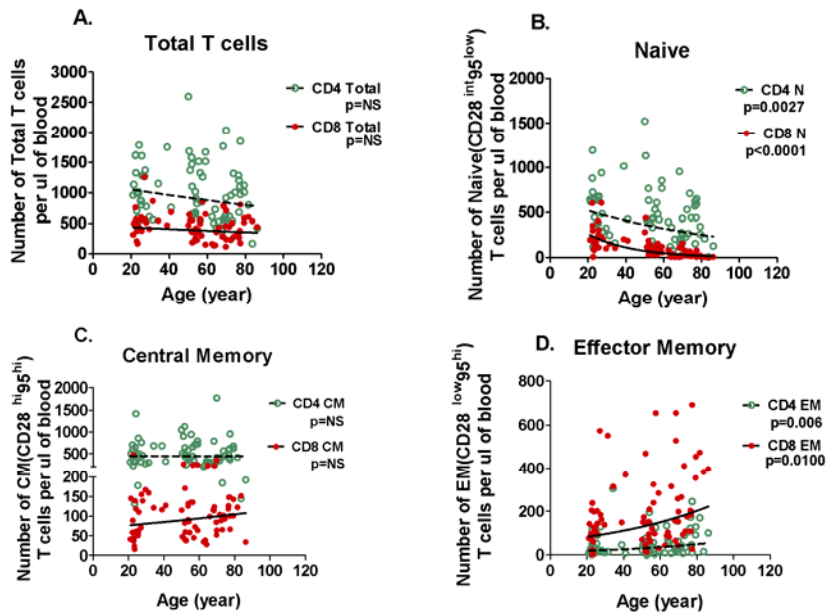

**Figure S1:**  
**Absolute numbers of CD8 T cells and CD8 naive cells decline with age in CMV(-) subjects, memory pools accumulate with age in CMV(+) subjects – frozen PBMC analysis.**

Frozen PBMC were phenotyped via multi-color flow cytometry. The analysis was performed and the panels were modeled exactly as in Fig. 2 (Panel A) and Fig 3 (Panel B).

Analysis encompassed N = 78 CMV(-) individuals ranging in age from 21-100 (Panel A). Analysis encompassed N = 75 CMV(+) individuals ranging in age from 21- 96 (Panel B). The lines drawn in the figure and p values are based upon the regression parameters as detailed in the methods and illustrated within supplemental Table ST1).

## Supplemental Table 1 – REGRESSION TABLES FOR FIGURES 1-3 & S1

### A. Fig 2,3 Regression Table Base on the absolute cell count (log10 transformed).

| Cell population | CMV Status | Regression parameter estimate |                | p-value for slope | P-value for Additivity | Final Formula for Regression Line <sup>1</sup><br>( $Y = 10^{(a+b*X)}$ )                                                                             |
|-----------------|------------|-------------------------------|----------------|-------------------|------------------------|------------------------------------------------------------------------------------------------------------------------------------------------------|
|                 |            | Intercept(a)                  | Slope (Age)(b) |                   |                        |                                                                                                                                                      |
| Total           | ALL        | 3.039                         | -0.0015        | 0.0247            | 0.2312                 | $\text{Log}_{10}(\text{CD4T}) = 3.039 - 0.0015 \times \text{Age}$                                                                                    |
|                 | CMV-       | 2.980                         | -0.0006        | 0.5911            |                        |                                                                                                                                                      |
|                 | CMV+       | 3.092                         | -0.0022        | 0.0091            |                        |                                                                                                                                                      |
| CD4 CM          | ALL        | 2.478                         | 0.0009         | 0.4109            | 0.1676                 | $\text{Log}_{10}(\text{CD4CM}) = 2.478 + 0.0009 \times \text{Age}$                                                                                   |
|                 | CMV-       | 2.370                         | 0.0025         | 0.1480            |                        |                                                                                                                                                      |
|                 | CMV+       | 2.576                         | -0.0005        | 0.6936            |                        |                                                                                                                                                      |
| CD4 EM          | ALL        | 0.650                         | 0.0075         | 0.0001            | 0.5796                 | CMV-: $\text{Log}_{10}(\text{CD4EM}) = 0.462 + 0.0025 \times \text{Age}$<br>CMV+: $\text{Log}_{10}(\text{CD4EM}) = 1.103 + 0.0044 \times \text{Age}$ |
|                 | CMV-       | 0.462                         | 0.0025         | 0.3750            |                        |                                                                                                                                                      |
|                 | CMV+       | 1.103                         | 0.0044         | 0.0437            |                        |                                                                                                                                                      |
| CD4 NA          | ALL        | 2.758                         | -0.0025        | 0.0182            | 0.4270                 | $\text{Log}_{10}(\text{CD4NA}) = 2.758 - 0.0025 \times \text{Age}$                                                                                   |
|                 | CMV-       | 2.714                         | -0.0012        | 0.4697            |                        |                                                                                                                                                      |
|                 | CMV+       | 2.776                         | -0.0030        | 0.0282            |                        |                                                                                                                                                      |
| Total           | ALL        | 2.591                         | -0.0037        | <.0001            | 0.0084                 | CMV-: $\text{Log}_{10}(\text{CD8T}) = 2.664 - 0.0073 \times \text{Age}$<br>CMV+: $\text{Log}_{10}(\text{CD8T}) = 2.616 - 0.0029 \times \text{Age}$   |
|                 | CMV-       | 2.664                         | -0.0073        | <.0001            |                        |                                                                                                                                                      |
|                 | CMV+       | 2.616                         | -0.0029        | 0.0049            |                        |                                                                                                                                                      |
| CD8 CM          | ALL        | 1.699                         | 0.0019         | 0.0726            | 0.3899                 | $\text{Log}_{10}(\text{CD8CM}) = 1.699 + 0.0019 \times \text{Age}$                                                                                   |
|                 | CMV-       | 1.725                         | 0.0002         | 0.8897            |                        |                                                                                                                                                      |
|                 | CMV+       | 1.721                         | 0.0021         | 0.1179            |                        |                                                                                                                                                      |
| CD8 EM          | ALL        | 1.597                         | 0.0032         | 0.0193            | 0.0086                 | CMV-: $\text{Log}_{10}(\text{CD8EM}) = 1.655 - 0.0034 \times \text{Age}$<br>CMV+: $\text{Log}_{10}(\text{CD8EM}) = 1.752 + 0.0036 \times \text{Age}$ |
|                 | CMV-       | 1.655                         | -0.0034        | 0.1030            |                        |                                                                                                                                                      |
|                 | CMV+       | 1.752                         | 0.0036         | 0.0287            |                        |                                                                                                                                                      |
| CD8 NA          | ALL        | 2.749                         | -0.0175        | <.0001            | 0.1410                 | $\text{Log}_{10}(\text{CD8NA}) = 2.749 - 0.0175 \times \text{Age}$                                                                                   |
|                 | CMV-       | 2.626                         | -0.0155        | <.0001            |                        |                                                                                                                                                      |
|                 | CMV+       | 2.853                         | -0.0191        | <.0001            |                        |                                                                                                                                                      |

1. If either additivity (equal slope) test or equal intercept test, is significant (p-value < 0.05), then separate regression model for CMV- and CMV+.

### B. Fig 1 Regression Table Based on % cell population.

| Cell population | CMV Status | Regression parameter estimate |                | p-value for slope | P-value for Additivity | Final Formula for Regression Line <sup>1</sup><br>( $Y = a + b * X$ )                                                    |
|-----------------|------------|-------------------------------|----------------|-------------------|------------------------|--------------------------------------------------------------------------------------------------------------------------|
|                 |            | Intercept(a)                  | Slope (Age)(b) |                   |                        |                                                                                                                          |
| Total           | ALL        | 67.376                        | 0.0913         | 0.0006            | <0.0001                | CMV-: $\% \text{CD4T} = 62.382 + 0.2599 \times \text{Age}$<br>CMV+: $\% \text{CD4T} = 68.477 + 0.0345 \times \text{Age}$ |
|                 | CMV-       | 62.382                        | 0.2599         | <.0001            |                        |                                                                                                                          |
|                 | CMV+       | 68.477                        | 0.0345         | 0.2813            |                        |                                                                                                                          |
| CD4 CM          | ALL        | 36.477                        | 0.1039         | 0.0192            | 0.2736                 | $\% \text{CD4CM} = 36.477 + 0.1039 \times \text{Age}$                                                                    |
|                 | CMV-       | 32.718                        | 0.1572         | 0.0315            |                        |                                                                                                                          |
|                 | CMV+       | 39.973                        | 0.0555         | 0.3339            |                        |                                                                                                                          |
| CD4 EM          | ALL        | 2.281                         | 0.0397         | 0.0896            | 0.1694                 | $\% \text{CD4EM} = 2.281 + 0.0397 \times \text{Age}$                                                                     |
|                 | CMV-       | 3.027                         | -0.0205        | 0.5864            |                        |                                                                                                                          |
|                 | CMV+       | 3.387                         | 0.0455         | 0.1260            |                        |                                                                                                                          |
| CD4 NA          | ALL        | 58.769                        | -0.1288        | 0.0063            | 0.7190                 | $\% \text{CD4NA} = 258.769 - 0.1288 \times \text{Age}$                                                                   |
|                 | CMV-       | 61.905                        | -0.1194        | 0.1196            |                        |                                                                                                                          |
|                 | CMV+       | 53.899                        | -0.0843        | 0.1628            |                        |                                                                                                                          |
| CD8 Total       | ALL        | 23.071                        | -0.0355        | 0.1268            | <0.0001                | CMV-: $\% \text{CD8T} = 27.834 - 0.1936 \times \text{Age}$<br>CMV+: $\% \text{CD8T} = 21.919 + 0.0189 \times \text{Age}$ |
|                 | CMV-       | 27.834                        | -0.1936        | <.0001            |                        |                                                                                                                          |

|    |      |        |         |        |        |                                                                         |
|----|------|--------|---------|--------|--------|-------------------------------------------------------------------------|
|    | CMV+ | 21.919 | 0.0189  | 0.5037 |        |                                                                         |
| CM | ALL  | 14.119 | 0.2949  | <.0001 | 0.0503 | %CD8CM = 14.119 + 0.2949×Age                                            |
|    | CMV- | 11.686 | 0.4223  | <.0001 |        |                                                                         |
|    | CMV+ | 13.019 | 0.2707  | <.0001 |        |                                                                         |
| EM | ALL  | 6.589  | 0.4675  | <.0001 | 0.0014 | CMV-: %CD8EM = 11.947 + 0.2068×Age<br>CMV+: %CD8EM = 8.296 + 0.5222×Age |
|    | CMV- | 11.947 | 0.2068  | 0.0075 |        |                                                                         |
|    | CMV+ | 8.296  | 0.5222  | <.0001 |        |                                                                         |
| NA | ALL  | 77.193 | -0.7572 | <.0001 | 0.1222 | %CD8NA = 77.193 – 0.7572×Age                                            |
|    | CMV- | 74.843 | -0.6299 | <.0001 |        |                                                                         |
|    | CMV+ | 75.977 | -0.7802 | <.0001 |        |                                                                         |

**C. Supplemental Fig 1, Regression Table. Base on the absolute cell count (log10 transformed).**

| Cell population | CMV Status | Regression parameter estimate |                | p-value for slope | P-value for Additivity | Final Formula for Regression Line <sup>1</sup><br>(Y = 10 <sup>a</sup> + b×X)                                    |
|-----------------|------------|-------------------------------|----------------|-------------------|------------------------|------------------------------------------------------------------------------------------------------------------|
|                 |            | Intercept(a)                  | Slope (Age)(b) |                   |                        |                                                                                                                  |
| Total           | ALL        | 3.0555                        | -0.00189       | 0.0159            | 0.9129                 | Log <sub>10</sub> (CD4T) = 3.0555 – 0.00189×Age                                                                  |
|                 | CMV-       | 3.0478                        | -0.00179       | 0.1066            |                        |                                                                                                                  |
|                 | CMV+       | 3.0621                        | -0.00197       | 0.0774            |                        |                                                                                                                  |
| CD4             | ALL        | 2.6853                        | -0.00076       | 0.3769            | 0.4703                 | Log <sub>10</sub> (CD4CM) = 2.6853 – 0.00076×Age                                                                 |
|                 | CMV-       | 2.7180                        | -0.00138       | 0.2578            |                        |                                                                                                                  |
|                 | CMV+       | 2.6525                        | -0.00014       | 0.9170            |                        |                                                                                                                  |
| EM              | ALL        | 0.9462                        | 0.00275        | 0.2498            | 0.0874                 | CMV-: Log <sub>10</sub> (CD4EM) = 0.6680 + 0.00091×Age<br>CMV+: Log <sub>10</sub> (CD4EM) = 1.1124 + 0.00715×Age |
|                 | CMV-       | 0.6680                        | 0.00091        | 0.7235            |                        |                                                                                                                  |
|                 | CMV+       | 1.1124                        | 0.00715        | 0.0060            |                        |                                                                                                                  |
| NA              | ALL        | 2.7761                        | -0.00378       | 0.0021            | 0.2697                 | Log <sub>10</sub> (CD4NA) = 2.7761 – 0.00378×Age                                                                 |
|                 | CMV-       | 2.7374                        | -0.00253       | 0.1404            |                        |                                                                                                                  |
|                 | CMV+       | 2.8203                        | -0.00521       | 0.0027            |                        |                                                                                                                  |
| Total           | ALL        | 2.7417                        | -0.00504       | <.0001            | 0.0002                 | CMV-: Log <sub>10</sub> (CD8T) = 2.7906 – 0.00785×Age<br>CMV+: Log <sub>10</sub> (CD8T) = 2.6685 – 0.00153×Age   |
|                 | CMV-       | 2.7906                        | -0.00785       | <.0001            |                        |                                                                                                                  |
|                 | CMV+       | 2.6685                        | -0.00153       | 0.1920            |                        |                                                                                                                  |
| CD8             | ALL        | 1.8924                        | 0.00022        | 0.8361            | 0.0784                 | Log <sub>10</sub> (CD8CM) = 1.8924 + 0.00022×Age                                                                 |
|                 | CMV-       | 1.9347                        | -0.00147       | 0.3238            |                        |                                                                                                                  |
|                 | CMV+       | 1.8394                        | 0.00225        | 0.1314            |                        |                                                                                                                  |
| EM              | ALL        | 1.8390                        | 0.00109        | 0.5884            | 0.0087                 | CMV-: Log <sub>10</sub> (CD8EM) = 1.8373 – 0.00289×Age<br>CMV+: Log <sub>10</sub> (CD8EM) = 1.7842 + 0.00654×Age |
|                 | CMV-       | 1.8373                        | -0.00289       | 0.2509            |                        |                                                                                                                  |
|                 | CMV+       | 1.7842                        | 0.00654        | 0.0100            |                        |                                                                                                                  |
| NA              | ALL        | 2.7764                        | -0.01764       | <.0001            | 0.7809                 | Log <sub>10</sub> (CD8NA) = 2.7764 – 0.01764×Age                                                                 |
|                 | CMV-       | 2.7744                        | -0.01730       | <.0001            |                        |                                                                                                                  |
|                 | CMV+       | 2.7825                        | -0.01808       | <.0001            |                        |                                                                                                                  |

<sup>1</sup> If either additivity (equal slope) test or equal intercept test, is significant (p-value < 0.05), then separate regression model for CMV- and CMV+.

**SUPPLEMENTAL FIGURE 2.**

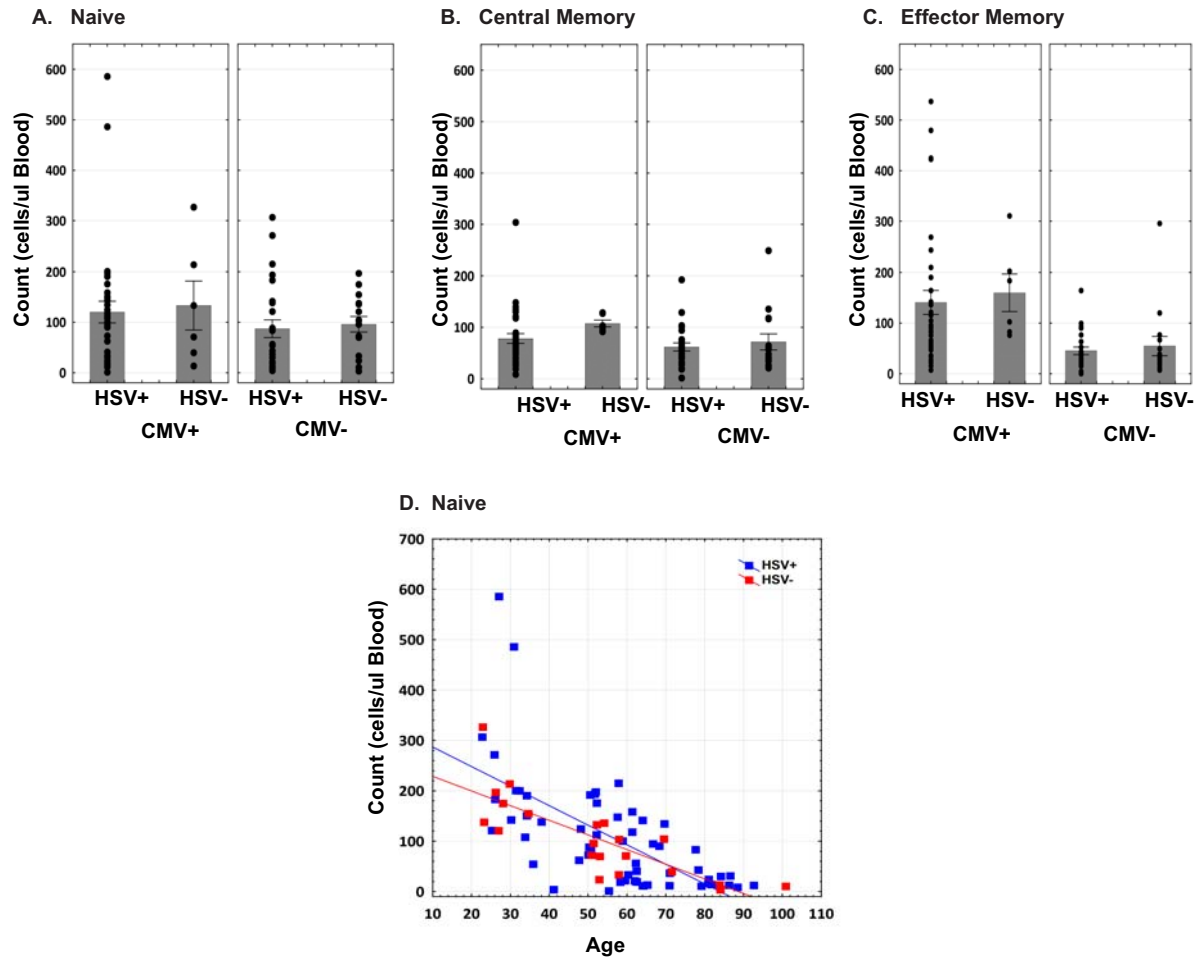

**Figure S2. HSV-1 does not affect memory inflation.** CD8 T cell subset analysis from 80 subjects (40 CMV+ and 40 CMV-) randomly selected across the age range of the cohort (21-100yrs), were assessed based upon HSV-1 and CMV status demonstrates that naïve count (**A**) central memory count (**B**) and effector memory count (**C**) are not significantly different in the presence or the absence of HSV-1. Panel **D** illustrates that the naïve decline is also not significantly different between HSV-1 (+) and HSV-1 (-) donors over the cohort age range.

**Supplemental Figure 3.**

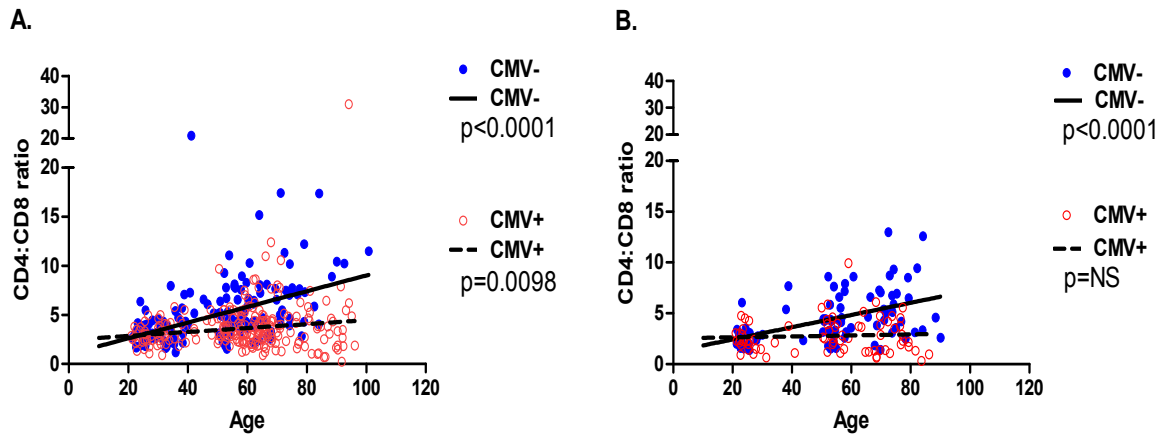

**Figure S3. Age-related alteration of the CD4:CD8 ratio is dependent upon CMV Status.**

A) Data were derived from the primary results shown in Figs. 2 & 3 and were obtained by dividing the numbers of CD4 cells by the numbers of CD8 cells for each CMV+ and CMV- individual (n=394 (CMV(-) n=152; CMV+ n=239); multiple regression model with age and CMV status as covariates was used to calculate significance. B) Frozen PBMC (n = 153 individuals (CMV(-) n=78; CMV(+) n=75) were phenotyped via multi-color flow cytometry analysis encompassing individuals between ages 21- 100.
